# Supplementary figures and images for: Prognostic value of National Early Warning Scores (NEWS2) and component physiology in hospitalised patients with COVID-19: a multicentre study
Source: HighWire-hosted journal article supplement (doi:10.1136/emermed-2020-210624), 2022-03-15

### First scores

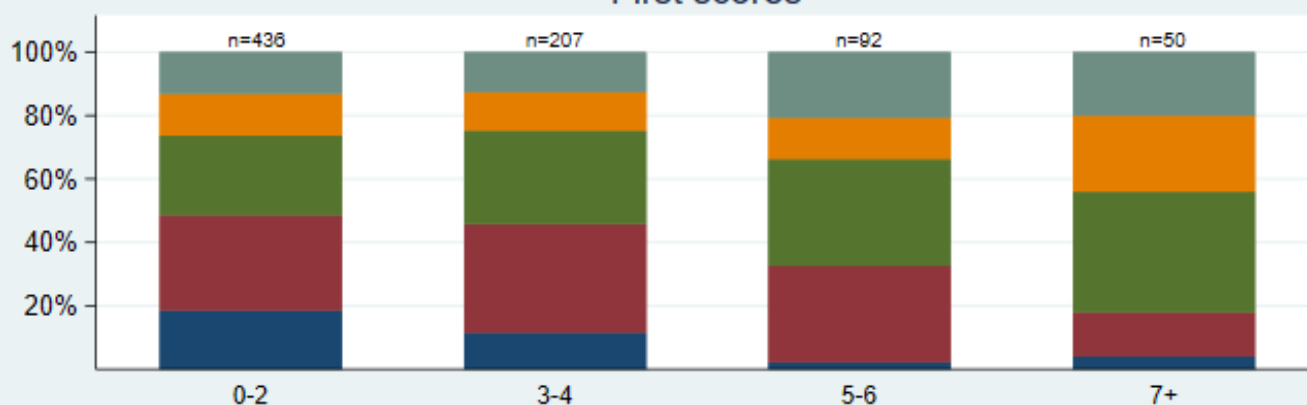

### Maximum scores

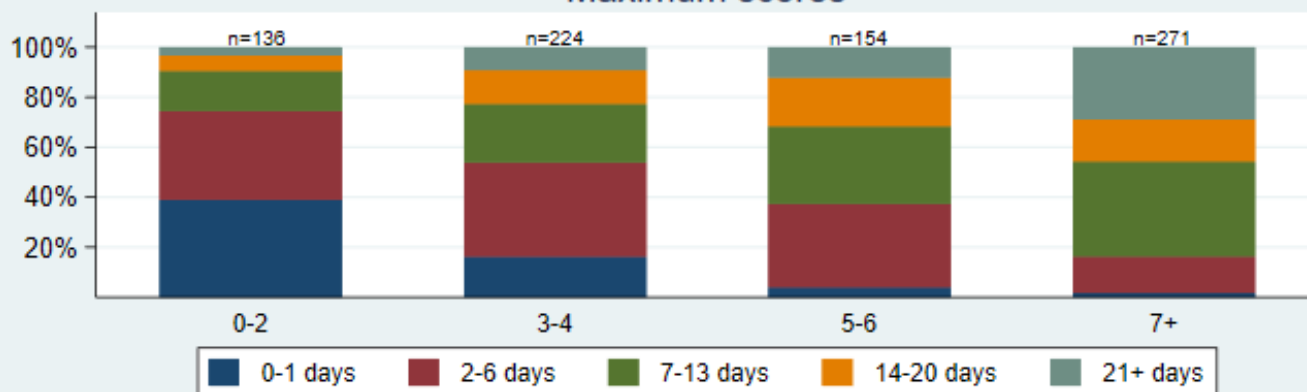

Supplement: emermed-2020-210624supp002_data_supplement.pdf [file emermed-2020-210624supp002_data_supplement.pdf]

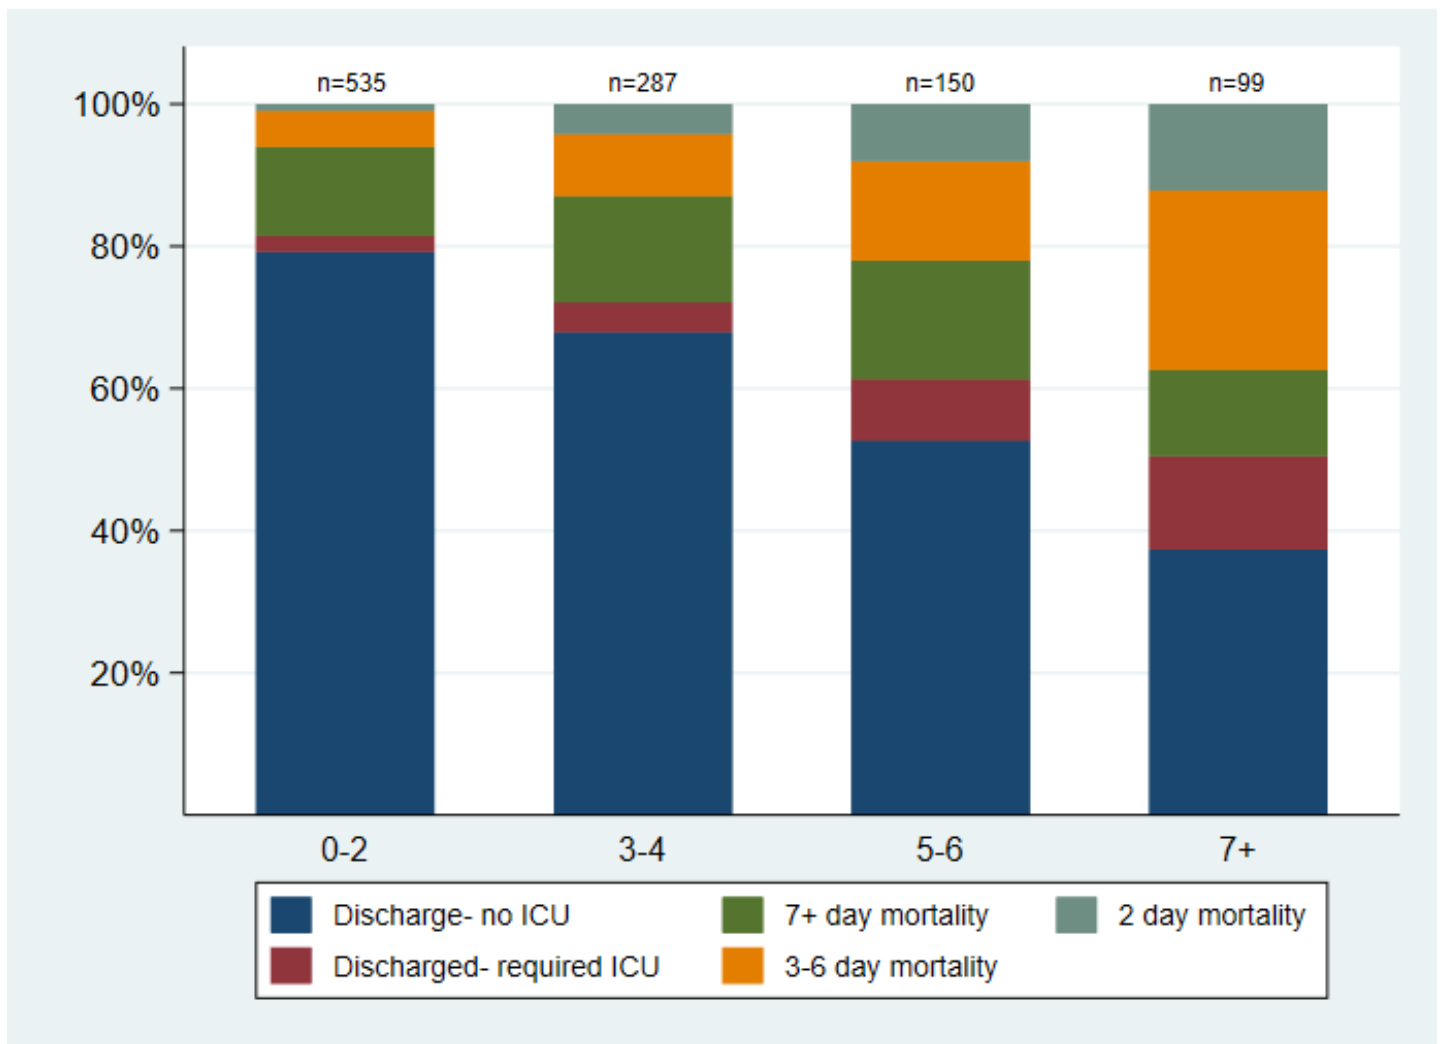

Supplement: emermed-2020-210624supp003_data_supplement.pdf [file emermed-2020-210624supp003_data_supplement.pdf]

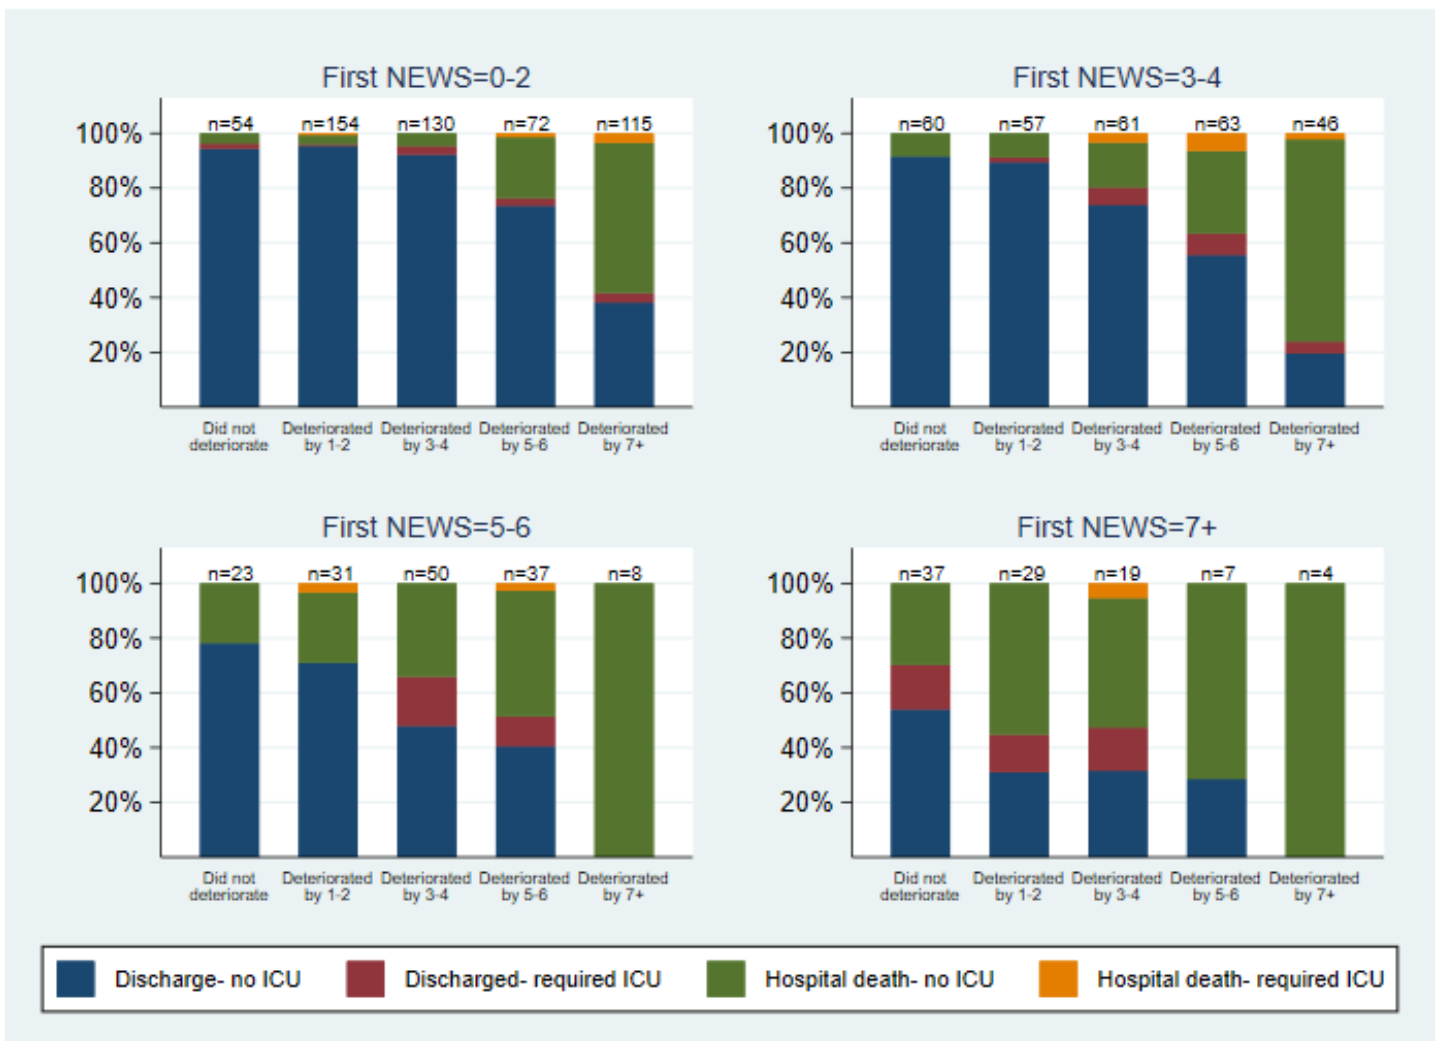

Supplement: emermed-2020-210624supp004_data_supplement.pdf [file emermed-2020-210624supp004_data_supplement.pdf]
